# Supplementary material
Source: publisher site journal article supplement (https://www.dovepress.com/article/543854)
Supplement: Supplementary file 1 [file 543854%20Revised%20Supplementary%20Materials.pdf]

**Supplementary Table 1:** Criteria for children aged 6-12 years to screen overweight and obesity

| Age (years) | Boys                            |                              | Girls                           |                              |
|-------------|---------------------------------|------------------------------|---------------------------------|------------------------------|
|             | Overweight (kg/m <sup>2</sup> ) | Obesity (kg/m <sup>2</sup> ) | Overweight (kg/m <sup>2</sup> ) | Obesity (kg/m <sup>2</sup> ) |
| 6.0~        | 16.4                            | 17.7                         | 16.2                            | 17.5                         |
| 6.5~        | 16.7                            | 18.1                         | 16.5                            | 18                           |
| 7.0~        | 17                              | 18.7                         | 16.8                            | 18.5                         |
| 7.5~        | 17.4                            | 19.2                         | 17.2                            | 19                           |
| 8.0~        | 17.8                            | 19.7                         | 17.6                            | 19.4                         |
| 8.5~        | 18.1                            | 20.3                         | 18.1                            | 19.9                         |
| 9.0~        | 18.5                            | 20.8                         | 18.5                            | 20.4                         |
| 9.5~        | 18.9                            | 21.4                         | 19                              | 21                           |
| 10.0~       | 19.2                            | 21.9                         | 19.5                            | 21.5                         |
| 10.5~       | 19.6                            | 22.5                         | 20                              | 22.1                         |
| 11.0~       | 19.9                            | 23                           | 20.5                            | 22.7                         |
| 11.5~       | 20.3                            | 23.6                         | 21.1                            | 23.3                         |
| 12.0~       | 20.7                            | 24.1                         | 21.5                            | 23.9                         |

**Supplementary Table 2:** Model fitting index for different models

|                | $\chi^2/df$ | RMSEA | GFI   | CFI   | IFI   | TLI   | AGFI  |
|----------------|-------------|-------|-------|-------|-------|-------|-------|
| <b>Model 1</b> | 9.294       | 0.090 | 0.956 | 0.934 | 0.935 | 0.892 | 0.910 |
| <b>Model 2</b> | 6.092       | 0.071 | 0.981 | 0.976 | 0.976 | 0.955 | 0.953 |
| <b>Model 3</b> | 2.478       | 0.038 | 0.984 | 0.985 | 0.985 | 0.973 | 0.966 |
